# Supplementary material for: Enhanced endocytosis of acid-sensitive doxorubicin derivatives with intelligent nanogel for improved security and efficacy
Source: Royal Society of Chemistry journal article supplement (doi:10.1039/c3bm60024f), 2013-01-01
Supplement: c3bm60024f.pdf [file c3bm60024f.pdf]

## Electronic Supplementary Information

### Enhanced endocytosis of acid-sensitive doxorubicin derivatives with intelligent nanogel for improved security and efficacy

Jianxun Ding<sup>†a</sup>, Fenghua Shi<sup>†ab</sup>, Di Li<sup>a</sup>, Li Chen<sup>\*b</sup>, Xiuli Zhuang<sup>\*a</sup>, Xuesi Chen<sup>a</sup>

<sup>a</sup>Key Laboratory of Polymer Ecomaterials, Changchun Institute of Applied Chemistry, Chinese Academy of Sciences, Changchun 130022, P. R. China. Fax: +86 431 85262367; Tel: +86 431 85262367; E-mail: zhuangxl@ciac.jl.cn

<sup>b</sup>Department of Chemistry, Northeast Normal University, Changchun 130024, P. R. China. Fax: +86 431 85099667; Tel: +86 431 85099667; E-mail: chenl686@nenu.edu.cn

<sup>†</sup> Electronic Supplementary Information (ESI) available. See DOI: 10.1039/b000000x/

<sup>‡</sup> These authors contributed equally to this work.

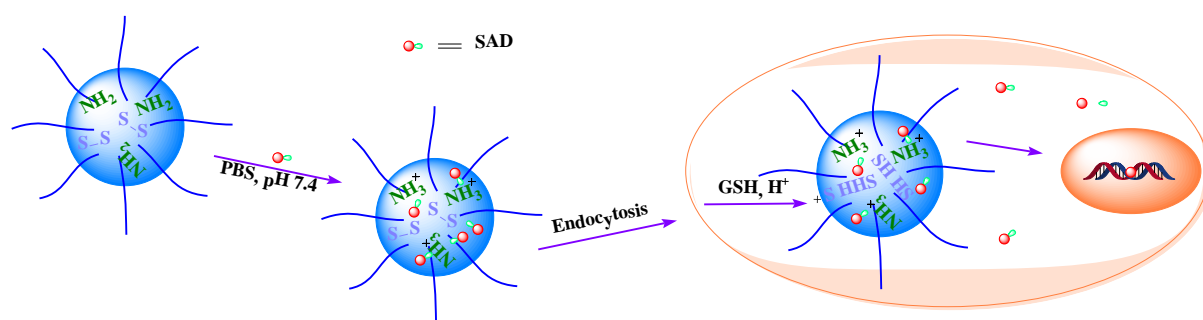

**Scheme S1** Schematic illustration of SAD loading and intracellular release.

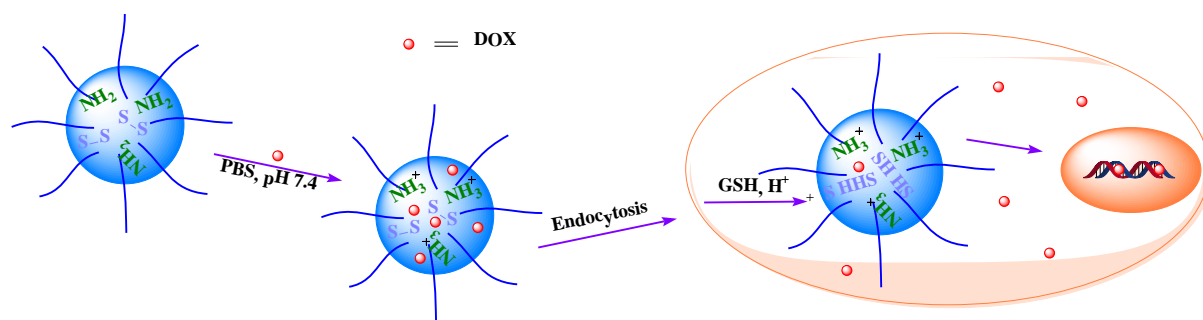

**Scheme S2** Schematic illustration of DOX loading and intracellular release.

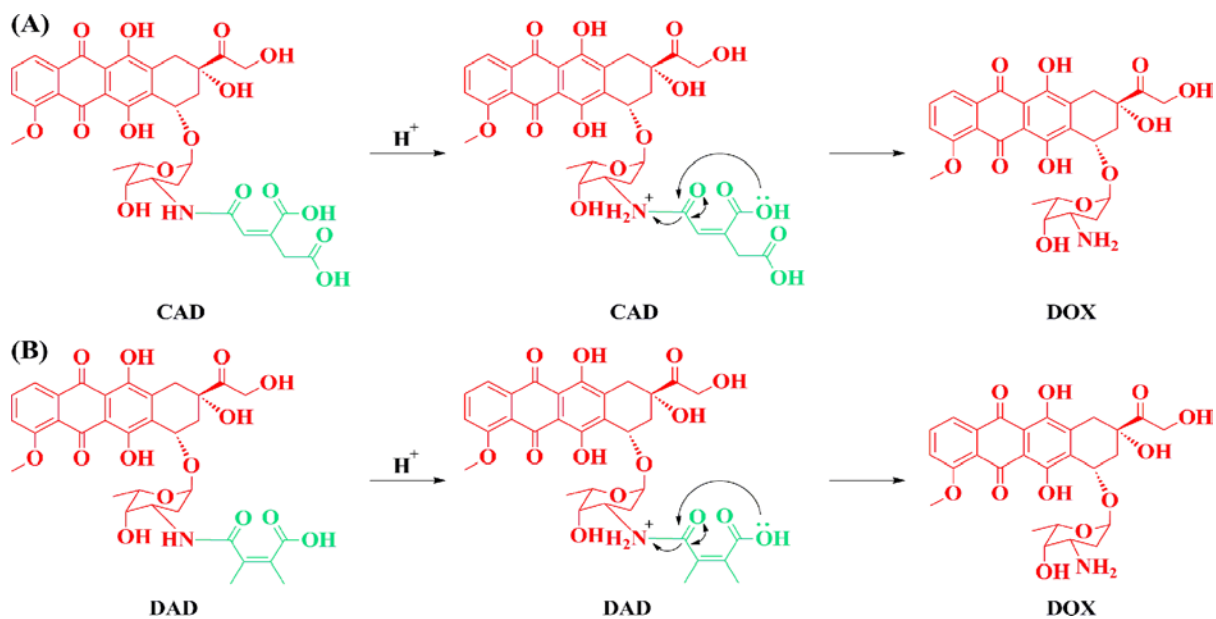

**Scheme S3** Schematic illustration of acid-triggered hydrolysis of CAD (A) and DAD (B).

**Table S1** IC<sub>50</sub> values of SAD, CAD, DAD and DOX after incubation toward HeLa and HepG2 cells for 24, 48 and 72 h.

| Cell  | Drug | 24 h (μM) | 48 h (μM) | 72 h (μM) |
|-------|------|-----------|-----------|-----------|
| HeLa  | SAD  | —         | —         | —         |
|       | CAD  | —         | 11.59     | 8.12      |
|       | DAD  | —         | 8.13      | 2.11      |
|       | DOX  | 2.71      | 1.48      | 1.05      |
| HepG2 | SAD  | —         | —         | —         |
|       | CAD  | —         | 12.29     | 6.19      |
|       | DAD  | —         | 7.22      | 2.34      |
|       | DOX  | 9.55      | 1.84      | 1.25      |

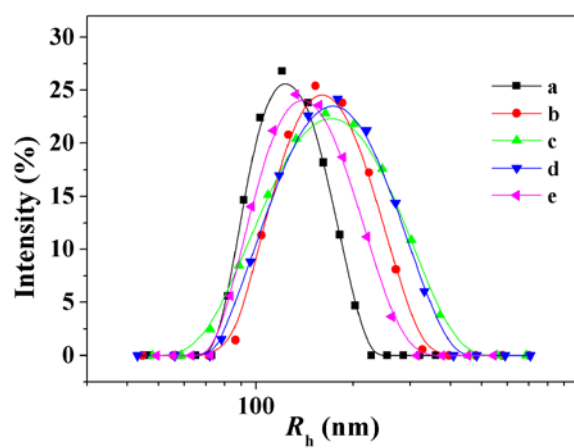

**Fig. S1** The hydrodynamic radii ( $R_h$ ) of nanogel (a), SAD (b), DAD (c), DAD (d) and DOX-loaded nanogels (e) in PBS at pH 7.4.
